# Supplementary material for: Disinfection of Mould-contaminated Archival Material by X-ray Irradiation – New Research Results on the Effect on Moulds and Cellulose
Source: publisher site journal article supplement (doi:10.1515/res-2022-0016), 2023-03-01
Supplement: Supplementary file 1 [file j_res-2022-0016_suppl_001.docx]

**Acknowledgements:**

Our sincere thanks go to Dr. Paul Raschle (former head of the microbiological laboratory at EMPA, Zurich) for his expert advice as part of the microbiological study, Dr. Giovanna Di Pietro (HKB) and Marcus Jacob (Historisches Museum Basel) for their preliminary work and the preparation of the project proposal, Synergy Health Däniken AG for the irradiation of the samples and the financial support, docusave AG for the vacuum freeze-drying of the samples and the financial support, Swissatest Testmaterialien AG for conducting the microbiological study, Prof. Dr. Antje Potthast and Dr. Sonja Schiehser (Institute for Chemistry of Renewable Resources at the University of Natural Resources and Life Sciences, Vienna BOKU) for determining the molecular weight distribution and Dr. Agnes Blüher (Swiss National Library in Bern) for providing the Bansa-Hofer folding device.

**Author contributions:**

Irradiation of the samples was performed at Synergy Health Däniken AG, which was involved as an implementation partner, under the guidance of Hans Hartmann.

The microbiological study was performed in the laboratory of Swissatest Testmaterialien AG under the guidance of Caroline Amberg.

Vacuum freeze-drying was performed at docusave AG, which was involved as an implementation partner, under the guidance of Guido Voser with assistance from Barbara Mordasini Voser and Gianclaudio Mordasini in a self-constructed vacuum freeze-drying system.

Spectrophotometric measurements and tensile strength tests were performed in the laboratory at HKB by Cornelius Palmbach.

Chemiluminescence measurements were performed in the laboratory at HKB by Dr. Andreas Buder.

As head of the specialisation graphics, written materials and photography of the degree programme Conservation and Restoration at HKB, Sebastian Dobrusskin provided continuous expert advice and support for the project.

Dr. Mathieu Jacot-Guillarmod and Olivia Raymann made an important contribution to the success of the project with their research on the physical fundamentals of X-rays and gamma radiation as well as on alternative disinfection methods.

**Article notes:**

Image credits: Figures 1–7, 10: Cornelius Palmbach, Figures 8, 9: Andreas Buder

Research project: *Röntgenbestrahlung zur Desinfektion von cellulose- / papierhaltigen Archiv- und Kulturgütern* (www.hkb.bfh.ch/de/Forschung/Projekte), 2017–2019, Bern University of Applied Sciences (BFH), Department Bern Academy of the Arts (HKB), Institute Materiality in Art and Culture (IMIKUK), project management: Cornelius Palmbach, responsibility: Sebastian Dobrusskin, team: Dr. Mathieu Jacot-Guillarmod, Olivia Raymann, implementation partners: Synergy Health Däniken AG (www.steris-ast.com), docusave AG (www.docusave.ch)
