# Supplementary material for: Disinfection of Mould-contaminated Archival Material by X-ray Irradiation – New Research Results on the Effect on Moulds and Cellulose
Source: publisher site journal article supplement (doi:10.1515/res-2022-0016), 2023-03-01
Supplement: Supplementary file 2 [file j_res-2022-0016_suppl_002.docx]

**Desinfektion schimmelbelasteter Archiv- und Kulturgüter mittels Röntgenbestrahlung** **– Neue Forschungsergebnisse zur Wirkung auf Schimmelpilze und Cellulose**

**Zusammenfassung:** In einem Forschungsprojekt wurde die Wirkung von Röntgenstrahlung auf Cellulose und einige häufig auf Papier vorkommender Schimmelpilze untersucht. Ziel war es, mögliche Einsatzgebiete der Röntgenbestrahlung als Desinfektionsmethode für Archivgut aufzuzeigen. Im Zentrum stand die Frage, ob und unter welchen Bedingungen sich Röntgenstrahlung als Alternative zur Gammastrahlung eignet und ob sie eventuell sogar materialschonender ist. Dazu wurde die minimale Dosis Röntgenstrahlung ermittelt, die nötig ist, um die Keimzahl auf ein unbedenkliches Maß zu reduzieren. Die materialverändernde Wirkung dieser Dosis wurde an mit Röntgen- und Gammastrahlung behandelten Probekörpern untersucht. Spektralphotometrische Messungen ergaben, dass es bei beiden Strahlungsarten zu keiner erkennbaren Farbveränderung kommt. Die Bestimmung der Molmassenverteilung wiederum zeigte, dass bei beiden Behandlungsmethoden die Molmasse der Cellulose erheblich reduziert wird. Mittels Zugfestigkeitsprüfungen konnte jedoch nachgewiesen werden, dass dies keinen signifikanten Einfluss auf die Zugfestigkeit hat. Auch die Untersuchung des Oxidationsverhaltens ergab keinen signifikanten Unterschied zwischen den unterschiedlich behandelten Proben. Die Untersuchungen zeigen also, dass beide Methoden eine nahezu identische materialverändernde Wirkung auf die Cellulose haben. Somit ist die Röntgenbehandlung vor allem eine Ergänzung zu den bekannten Desinfektionsmethoden und insbesondere für solche Objekte geeignet, die einer Behandlung mit Alkohol nicht standhalten würden.

**Désinfection de fonds d’archives et de biens culturels à l’aide de rayons X : résultat des études menées sur leur effet sur les moisissures et la cellulose**

**Résumé:** ce projet de recherche a étudiél’effet de rayons X durs sur la cellulose et sur les spores de moisissures fréquents sur le papier, l’objectif étant de déterminer le potentiel des rayons X pour désinfecter des fonds d’archives infestés par des moisissures. Il s’agissait principalement d’analyser dans quelle mesure les rayons X constituent une solution de rechange aux rayons gamma, notamment en termes de préservation des matériaux. L’étude a ainsi défini le dosage minimal de rayons X pour réduire le nombre des germes à un niveau inoffensif. L’effet de transformation des matériaux soumis à ce dosage minimal a ensuite été examiné à l’aide d’échantillons de cellulose de coton exposés à des rayons X et gamma. La spectrométrie a permis de constater que les deux types de rayons ne provoquent pas de changements de couleur perceptibles à l’œil nu. La distribution de la masse moléculaire a montré pour sa part que les deux méthodes de traitement réduisent considérablement le poids moyen de la masse des molécules de cellulose. Des essais subséquents ont toutefois permis de prouver que cette réduction n'a pas d’impact sur la résistance à la traction. Par ailleurs, les essais réalisés pour étudier le comportement à l'oxydation permettent de conclure que les propriétés des deux échantillons ne présentent pas de différences significatives. L’effet des deux méthodes sur la cellulose est pratiquement identique. Le traitement aux rayons X est ainsi à prendre au sens d’une méthode de désinfection complémentaire par rapport aux méthodes éprouvées, notamment pour les objets qui ne résisteraient pas à un traitement à l’alcool.
